# Supplementary material
Source: publisher figshare collection journal article supplement (https://sage.figshare.com/ndownloader/files/14862158)
Supplement: Supplementary file 1 [file 14862158]

**ONLINE APPENDICES**

**The Score is Not the Music: Integrating Experience and Practice Perspectives on Value Co-Creation in Collective Consumption Contexts**

**Online Appendix A: Prior literature on value co-creation**

Table A1presents a more complete list of prior literature on value co-creation from either experience- or practice-based perspectives. It highlights that while there is an increased focus on value co-creation between multiple actors (i.e. beyond the supplier-customer dyad), an integrated perspective of value co-creation in collective consumption contexts is largely absent.

**Table A1** Experience-based and practice-based perspectives on value co-creation

| **Year** | **Authors** | **Focal actor(s)** | | | **Type of study** | | **Perspective on  value co-creation** | | |
| --- | --- | --- | --- | --- | --- | --- | --- | --- | --- |
| **Service provider** | **Consumer** | **Multiple actor types** | **Conceptual** | **Empirical** | **Process** | **Practice** | **Experience** |
| 2004 | Prahalad and Ramaswamy |  |  |  |  |  |  |  |  |
| 2004 | Vargo and Lusch |  |  |  |  |  |  |  |  |
| 2008 | Payne, Storbacka, and Frow |  |  |  |  |  |  |  |  |
| 2008 | Vargo, Maglio, and Akaka |  |  |  |  |  |  |  |  |
| 2009 | Schau, Muñiz, and Arnould |  |  |  |  |  |  |  |  |
| 2010 | Korkman, Storbacka, and Harald |  |  |  |  |  |  |  |  |
| 2011 | Akaka and Chandler |  |  |  |  |  |  |  |  |
| 2011 | Echeverri and Skålén |  |  |  |  |  |  |  |  |
| 2012 | McColl-Kennedy, Vargo, Dagger, Sweeney, and Van Kasteren |  |  |  |  |  |  |  |  |
| 2012 | Helkkula, Kelleher, and Pihlstrom |  |  |  |  |  |  |  |  |
| 2013 | Grönroos and Voima |  |  |  |  |  |  |  |  |
| 2013 | Gummerus |  |  |  |  |  |  |  |  |
| 2015 | Caru and Cova |  |  |  |  |  |  |  |  |
| 2015 | Akaka, Vargo, and Schau |  |  |  |  |  |  |  |  |
| 2015 | Laamanen and Skålén |  |  |  |  |  |  |  |  |
| 2015 | Hartmann, Wiertz, and Arnould |  |  |  |  |  |  |  |  |
| 2015 | Skålén, Gummerus, Von Koskull, and Magnusson |  |  |  |  |  |  |  |  |
| 2015 | Skålén, Pace, and Cova |  |  |  |  |  |  |  |  |
| 2016 | Vargo and Lusch |  |  |  |  |  |  |  |  |
| 2016 | Figueiredo and Scaraboto |  |  |  |  |  |  |  |  |
| 2016 | Frow, McColl-Kennedy, and Payne |  |  |  |  |  |  |  |  |
| 2017 | Wilden, Akaka, Karpen, and Hohberger |  |  |  |  |  |  |  |  |
| 2018 | Yu and Sangiorgi |  |  |  |  |  |  |  |  |
| 2018 | Helkkula, Kowalkowski, and Tronvoll |  |  |  |  |  |  |  |  |
|  | **This Study** |  |  |  |  |  |  |  |  |

**Online Appendix A (cont.)**

**Table A1 - References**

Akaka, Melissa Archpru and Jennifer D. Chandler (2011), “Roles as Resources: A Social Roles Perspective of Change in Value Networks,” *Marketing Theory,* 11 (3), 243-260.

Akaka, Melissa Archpru, Stephen L. Vargo and Hope Jensen Schau (2015), "The Context of Experience," *Journal of Service Management*, 26 (2), 206-22.

Caru, Antonella and Bernard Cova (2015), “Co-creating the Collective Service Experience,” *Journal of Service Management*, 26 (2), 276-294.

Echeverri, Per and Per Skålén (2011), “Co-creation and Co-destruction: A Practice-theory Based Study on Interactive Value Formation,” *Marketing Theory,* 11 (3), 351-73.

Figueiredo, Bernardo and Daiane Scaraboto (2016), “The Systemic Creation of Value Through Circulation in Collaborative Consumer Networks,” *Journal of Consumer Research*, 43(4), 509-533.

Frow, Pennie, Janet R. McColl-Kennedy, and Adrian Payne (2016), “Co-creation Practices: Their Role in Shaping a Health Care Ecosystem,” *Industrial Marketing Management*, 56, 24-39.

Grönroos, Christian and Päivi Voima (2013), “Critical Service Logic: Making Sense of Value Creation and Co-creation,” *Journal of the Academy of Marketing Science,* 41 (2), 133-150.

Gummerus, Johanna (2013), “Value Creation Processes and Value Outcomes in Marketing Theory: Strangers or Siblings?” *Marketing Theory*, 13(1), 19-46.

Hartmann, Benjamin J., Caroline Wiertz, and Eric J. Arnould (2015), “Exploring Consumptive Moments of Value-Creating Practice in Online Community,” *Psychology and Marketing,* 32 (3), 319-340.

Helkkula, Anu, Carol Kelleher, and Minna Pihlstrom (2012), “Characterizing Value as an Experience: Implications for Service Researchers and Managers,” *Journal of Service Research*, 15, 59-75.

Helkkula, Anu, Christian Kowalkowski, and Bard Tronvoll (2018), “Archetypes of Service Innovation: Implications For Value Co-Creation,” *Journal of Service Research*, 21 (3), 284-301.

Korkman, Oskar, Kai Storbacka, and Bo Harald (2010), “Practices as Markets: Value Co-creation in E-invoicing,” *Australasian Marketing Journal*, 18 (4), 236-47.

Laamanen, Mikko and Per Skålén (2015), “Collective–Conflictual Value Co-creation: A Strategic Action Field Approach,” *Marketing Theory,* 15 (3), 381-400.

McColl-Kennedy, Janet R., Stephen L. Vargo, Tracey S. Dagger, Jillian C. Sweeney, and Yasmin van Kasteren (2012), “Health Care Customer Value Cocreation Practice Styles,” *Journal of Service Research*, 15 (4), 370-389.

Payne, Adrian F., Kaj Storbacka, and Pennie Frow (2008), “Managing the Co-creation of Value,” *Journal of the Academy of Marketing Science*, 36 (1), 83-96

Prahalad, C. K. and V. Ramaswamy (2004), “Co-creation Experiences: The Next Practice in Value-Creation,” *Journal of Interactive Marketing*, 18 (3), 5-14.

Schau, Hope Jensen, Al Muñiz Jr., and Eric J. Arnould (2009), “How Brand Community Practices Create Value,” *Journal of Marketing,* 73 (5), 30-51.

Skålén, Per, Johanna Gummerus, Catharina von Koskull, and Peter R. Magnusson (2015), “Exploring Value Propositions and Service Innovation: A Service-Dominant Logic Study,” *Journal of the Academy of Marketing Science*, 43 (2), 137-158.

Skålén, Per, Stefano Pace, and [Bernard Cova](http://www.emeraldinsight.com/action/doSearch?ContribStored=Cova%2C+B) (2015), “Firm-brand Community Value Co-creation as Alignment of Practices,” *European Journal of Marketing*, 49 (3/4), 596-620.

Vargo, Stephen L. and Robert F. Lusch (2004), “Evolving to a New Dominant Logic for Marketing,” *Journal of Marketing*, 68 (1), 1-17.

------ (2016), “Institutions and Axioms: An Extension and Update of Service-Dominant Logic,” *Journal of the Academy of Marketing Science*, 44 (1), 5-23.

Vargo, Stephen L., Paul P. Maglio, and Melissa Archpru Akaka (2008), "On Value and Value Co-creation: A Service Systems and Service Logic Perspective," *European Management Journal,* 26(3), 145-152.

Wilden, Ralf, Melissa Archpru Akaka, Ingo O Karpen and Jan Hohberger (2017), “The Evolution and Prospects of Service-Dominant Logic,” *Journal of Service Research*, 20 (4), 345-361.

Yu, Eun and Daniela Sangiorgi (2018), "Service Design as an Approach to Implement the Value Cocreation Perspective in New Service Development," *Journal of Service Research*, 21(1), 40-58.

**Online Appendix B: Research Protocol Summaries**

This Appendix presentsthe semi-structured interview protocols (1-3) used to ensure dependability (Beverland et al. 2010) across interviews. Also included is the participant observation protocol (4) for use within the research team for field notes and observations (after Charmaz 2006).

**Protocol 1: Service provider, Facilitators, and Musicians - long interviews**

Please tell me the story of how you came to work/perform with the MPO. Can you describe your experience so far? [Example prompts for rest of conversation:] How do you feel about the interactions between the MPO and its audiences at traditional versus participatory MPO events? If you had a magic wand, in an imaginary situation where anything is possible, is there anything that you would like to change about today’s/other MPO events? What does the MPO mean to you?

**Protocol 2: Consumer - long interviews**

Please tell me the story of how you came to be part of the MPO event. In relation to today’s event/performance/rehearsal, can you describe the experience so far? [Example prompts for rest of conversation:] How often do you participate in MPO events? How would you compare today’s experience to other MPO events that you have attended previously (if relevant)? What does the MPO mean to you? If you had a magic wand, in an imaginary situation where anything is possible, is there anything that you would like to change about today’s/ previous MPO events?

**Protocol 3: Consumer - short interviews**

Please tell me how you came to be part of the MPO event. In relation to today’s event/performance/rehearsal, can you describe the experience so far? [Example prompt for rest of conversation:] If you had a magic wand, in an imaginary situation where anything is possible, is there anything that you would like to change about today’s/ previous MPOevents?

**Protocol 4: Participant observation**

Field notes and reflections (after Charmaz 2006), including observations related to the following: What are players/service providers/facilitators/audience members doing/saying? What do actors pay attention to or pointedly ignore? What practices are at issue here? What procedures/skills/methods of operation do actors employ and how are they coordinated/opened up? How do participants appear to think, feel, and act while engaged in the practice? What do actors’ actions and statements take for granted? How do structure and context serve to support, maintain, impede, or change actors’ actions and statements? When, from their perspective, is an act well or poorly done?

**Online Appendix B - References**

Beverland, Michael B., Steven M. Kates, Adam Lindgreen, and Emily Chung (2010), “Exploring Consumer Conflict Management in Service Encounters,” *Journal of the Academy of Marketing Science*, 28 (5), 617-633.

Charmaz, Kathy (2006), *Constructing Grounded Theory: A Practical Guide Through Qualitative Analysis.* London, UK: Sage.

**Online Appendix C: Value co-creation practices and value categories**

This Appendix presents value co-creation practices (Table C1) and value categories (Table C2) indicating the number of interviews in which each category emerged.

**Table C1** Value co-creation practices

| **Practice category** | **Definition of practice** | **Actor 1** | | | | | **Total 2** |
| --- | --- | --- | --- | --- | --- | --- | --- |
| **M** | **F** | **S** | **CT** | **CP** |
| **Inculcating** | Practices that facilitate social learning over time. | **4** | **7** | **10** | **23** | **45** | **89** |
| **Facilitating** | Practices that bring about and enable social learning to coordinate collective performances. | **51** | **90** | **40** | **71** | **79** | **331** |
| *Reaching out* | Cultivating inclusive access by removing barriers to participation. | 28 | 48 | 8 | 4 | 6 | 94 |
| *Organizing* | Setting the scene for collective performances to be realized. Includes scheduling, programming, and promoting collective consumption performances. | 10 | 3 | 28 | 61 | 25 | 127 |
| *Guided mentoring* | De-mystifying realizing practices through explanatory commentary and demonstration for novices. | 13 | 39 | 4 | 6 | 48 | 110 |
| **Realizing** | Practices that relate to real-time engagement in and coordination of collective performances. | **87** | **54** | **14** | **227** | **331** | **713** |
| *Enacting* | Publicly interpreting meaning through collective performances. | 68 | 15 | 13 | 46 | 83 | 225 |
| *Entering into* | Participating immersively and competently to socially recognized standards. | 11 | 16 | 1 | 115 | 100 | 243 |
| *Improvising* | Participating in an extemporaneous, loosely scripted, and relatively unconstrained way. | 4 | 20 | 0 | 20 | 116 | 160 |
| *Spectating* | Passively observing, as an outsider, others who are actively participating. | 4 | 3 | 0 | 46 | 32 | 85 |
| **Sustaining** | Practices that maintain a collective of competent actors over time. | **13** | **4** | **49** | **48** | **20** | **134** |
| *Relating* | Fostering connection and feelings of fellowship and receptivity through group-oriented behaviors. | 12 | 4 | 8 | 19 | 6 | 49 |
| *Supporting* | Inviting and enabling actor participation by providing monetary and/or non-monetary assistance, directly or via support options signaled by the service provider. | 1 | 0 | 41 | 29 | 14 | 85 |

1. M = Musician, F = Facilitator, S = Service provider, CT = Consumer - Traditional event, CP = Consumer - Participatory event

2. Number of interviews in which practices were observed

**Online Appendix C (cont.)**

**Table C2** Value categories

| **Value category** | **Definition** | **Actor 1** | | | | | **Total 2** |
| --- | --- | --- | --- | --- | --- | --- | --- |
| **M** | **F** | **S** | **CT** | **CP** |
| Affective | Actors’ valenced emotional experiences, including hedonic, playful, somber, and nostalgic. | 4 | 7 | 1 | 35 | 27 | 74 |
| Social | Actors’ valenced experiences of connection with, shared learning with and help given to other actors with whom they interact and coordinate. Includes:  a) inclusive value: feeling connected with or alienated from other actors;  b) altruistic value: positive feelings arising from helping other actors. | 3 | 7 | 2 | 29 | 15 | 56 |
| Somatic | Actors’ embodied responses to practice participation, which are immediately, spontaneously, and physiologically felt. | 0 | 1 | 0 | 13 | 36 | 50 |
| Aesthetic | Actors’ visceral and cultivated responses to beauty and variety in artistic forms and expressions, experienced for their own sake and as an end. | 7 | 0 | 1 | 12 | 27 | 47 |
| Utilitarian | Actors’ evaluation of the instrumental benefits or drawbacks of practice participation, notably including functional and economic value. | 0 | 4 | 0 | 25 | 17 | 46 |
| Epistemic | Actors’ experiences of increased or reinforced competence through formal and informal learning mechanisms. | 0 | 1 | 0 | 14 | 12 | 27 |
| Spiritual | Actors’ experiences of otherworldliness: being transfixed, moved, or changed in ways that actors find mysterious and beyond rational comprehension. | 0 | 2 | 1 | 8 | 7 | 18 |

1. M = Musician, F = Facilitator, S = Service provider, CT = Consumer - Traditional event, CP = Consumer - Participatory event

2. Number of interviews in which value categories were observed
